# Supplementary material
Source: publisher site journal article supplement (https://www.dovepress.com/article/385168)
Supplement: Supplementary file 1 [file get_supplementary_file.php]

**Additional files:**

**S1 Appendix. Formula of the Saga fall risk model 2 (SFRM-2)**

**Formula of model 2**

$-5.8563 + 0.0096 \times (\text{Age}) + (\text{Male} = 0.5684) + (\text{Emergency admission} = 0.4418) +$   
 $(\text{Admitted department; Neurosurgery} = 0.6520) + (\text{Hypnotics; Using} = 0.3612, \text{Missing}$   
 $\text{data} = 0.2139) + (\text{History of fall} = 0.4362) + (\text{Independence of eating; Independent} =$   
 $0.2352, \text{Missing data} = -1.0436) + (\text{Bedriddenness rank; J} = 1.3758, \text{A} = 1.8317, \text{B} =$   
 $1.9186, \text{C} = 1.7205, \text{Not assessable} = -0.1505).$

**Predictive occurrence of fall during the administration (%)**

$100 \times \exp(\text{Score}) / \{1 + \exp(\text{Score})\}.$

## **S2 Appendix. Characteristics of Yuai-Kai Foundation and Oda Hospital**

The hospital contains 11 departments with 111 beds for acute care. The departments are Internal Medicine, General Medicine, General Surgery, Cardiovascular Surgery, Neurosurgery, Otorhinolaryngology, Plastic Surgery, Dermatology, Radiology, Anesthesiology, and Rehabilitation. It has no Orthopedic Surgery department. The hospital is located in the city of Kashima, in Saga prefecture in southern Japan. It covers an approximate population of 90,000, and treats approximately 3,100 inpatients each year, with a mean length of stay of 12.1 days.

**S1 Figure. Area under the receiver operating characteristic curve (AUC)**

AUC of the predictive model for falls (Saga fall risk model 2) for all patients.

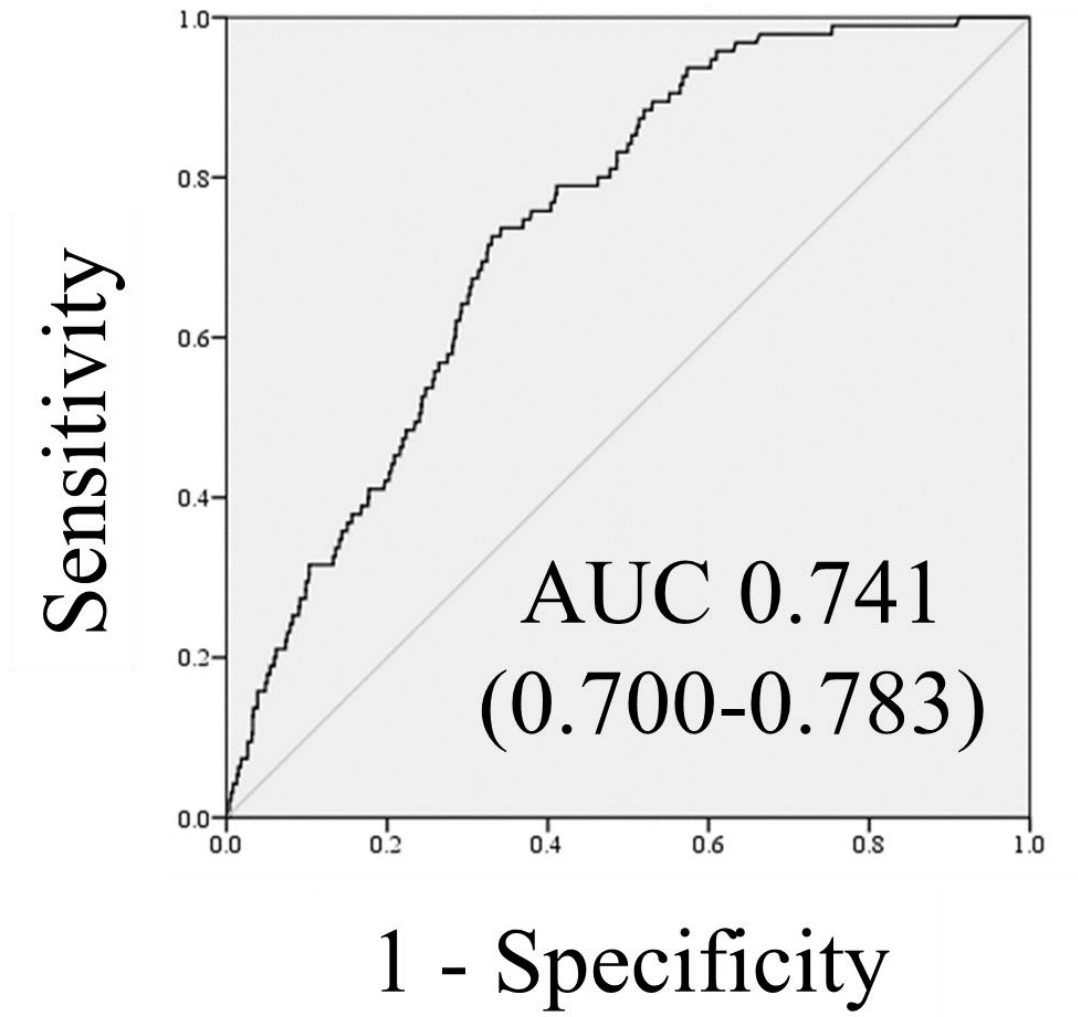

**S2 Figure. Predicted and observed rates of falls in 10 groups divided into 10 deciles by scores using the predictive model (Saga fall risk model 2)**

The gap between predicted and observed values was small enough to be used in the prediction of falls for either group, with excellent calibration of the model.

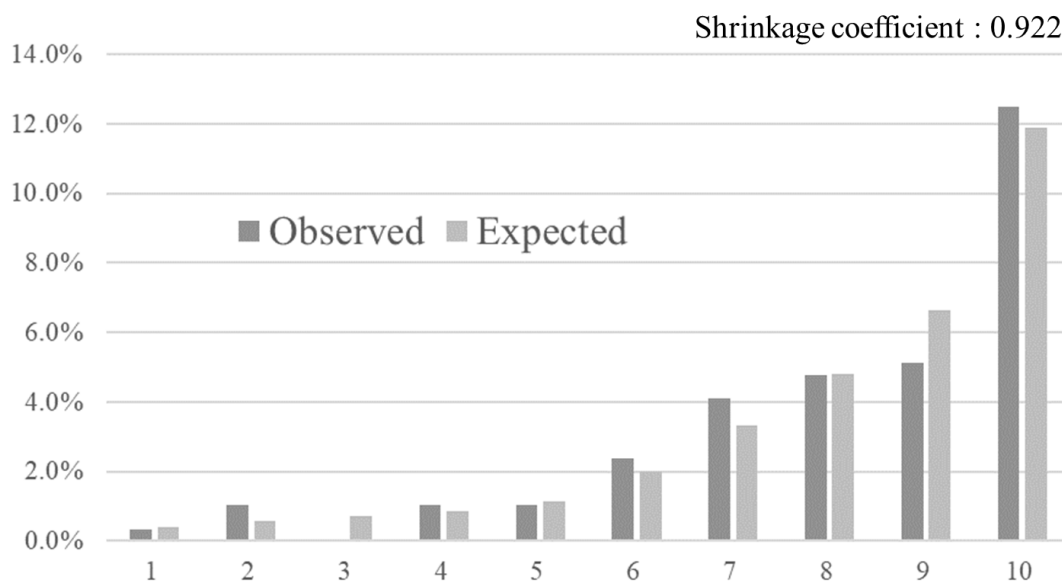

**S1 Table. Characteristics of patients admitted to the department of neurosurgery**

| Variable, Category               | Department, Neurosurgery<br>n = 96 |
|----------------------------------|------------------------------------|
| Age, years                       | 80 (73-86)                         |
| Sex, Male                        | 48 (50.0%)                         |
| Emergency admission, Yes         | 35 (36.5%)                         |
| Referral letter, Presence        | 38 (39.6%)                         |
| Hypnotic medications, Using      | 4 (4.2%)                           |
| Hypnotic medications, Missing    | 10 (10.4%)                         |
| Parkinson's syndrome, Presence   | 3 (3.1%)                           |
| History of falls, Presence       | 28 (29.2%)                         |
| Visual impairment, Presence      | 3 (3.1%)                           |
| Eating, Independent              | 54 (56.3%)                         |
| Eating, Requiring assistance     | 42 (43.8%)                         |
| Eating, Missing category         | 0 (0%)                             |
| Bedriddenness rank, Normal       | 26 (27.1%)                         |
| Bedriddenness rank, J            | 6 (6.3%)                           |
| Bedriddenness rank, A            | 22 (22.9%)                         |
| Bedriddenness rank, B            | 10 (10.4%)                         |
| Bedriddenness rank, C            | 32 (33.3%)                         |
| Cognitive function score, Normal | 43 (44.8%)                         |
| Cognitive function score, I      | 16 (16.7%)                         |
| Cognitive function score, II     | 10 (10.4%)                         |

|                                |            |
|--------------------------------|------------|
| Cognitive function score, III  | 16 (16.7%) |
| Cognitive function score, IV   | 8 (8.3%)   |
| Cognitive function score, M    | 3 (3.1%)   |
| <hr/>                          |            |
| Surgical operation, Undergone  | 19 (19.8%) |
| <hr/>                          |            |
| Rehabilitation, Undergone      | 55 (57.3%) |
| <hr/>                          |            |
| Length of hospital stay (days) | 12 (2-28)  |

Continuous and categorical variables are shown as median value (interquartile range) and number (percent).

**S2 Table. Characteristics of patients with or without rehabilitation during hospitalization**

| Variable, Category             | Rehabilitation, None<br>n=1,565 | Rehabilitation,<br>Undergone n=1,367 |
|--------------------------------|---------------------------------|--------------------------------------|
| Age, years                     | 74 (64-82)                      | 83 (77-88)                           |
| Sex, Male                      | 830 (53.0%)                     | 633 (46.3%)                          |
| Emergency admission, Yes       | 294 (18.8%)                     | 529 (38.7%)                          |
| Referral letter, Presence      | 322 (20.6%)                     | 467 (34.2%)                          |
| Department, Internal Medicine  | 681 (43.5%)                     | 742 (54.3%)                          |
| Department, Neurosurgery       | 41 (2.6%)                       | 55 (4.0%)                            |
| Hypnotic medications, Using    | 168 (10.7%)                     | 202 (14.8%)                          |
| Hypnotic medications, Missing  | 68 (4.3%)                       | 103 (7.5%)                           |
| Parkinson's syndrome, Presence | 9 (0.6%)                        | 18 (1.3%)                            |
| History of falls, Presence     | 99 (6.3%)                       | 256 (18.7%)                          |
| Visual impairment, Presence    | 20 (1.3%)                       | 20 (1.5%)                            |
| Eating, Independent            | 1,314 (84.0%)                   | 726 (53.1%)                          |
| Eating, Requiring assistance   | 250 (16.0%)                     | 641 (46.9%)                          |
| Eating, Missing category       | 1 (0.1%)                        | 0 (0.0%)                             |
| Bedriddenness rank, Normal     | 974 (62.2%)                     | 301 (22.0%)                          |
| Bedriddenness rank, J          | 155 (9.9%)                      | 139 (10.2%)                          |
| Bedriddenness rank, A          | 200 (12.8%)                     | 328 (24.0%)                          |
| Bedriddenness rank, B          | 96 (6.1%)                       | 234 (17.1%)                          |
| Bedriddenness rank, C          | 140 (8.9%)                      | 365 (26.7%)                          |

|                                   |               |             |
|-----------------------------------|---------------|-------------|
| Cognitive function score, Normal  | 1,189 (76.0%) | 589 (43.1%) |
| Cognitive function score, I       | 125 (8.0%)    | 211 (15.4%) |
| Cognitive function score, II      | 75 (4.8%)     | 165 (12.1%) |
| Cognitive function score, III     | 121 (7.7%)    | 303 (22.2%) |
| Cognitive function score, IV      | 35 (2.2%)     | 79 (5.8%)   |
| Cognitive function score, M       | 16 (1.0%)     | 16 (1.2%)   |
| Cognitive function score, missing | 4 (0.3%)      | 4 (0.3%)    |
| Surgical operation, Undergone     | 520 (33.2%)   | 436 (31.9%) |
| Length of hospital stay (days)    | 6 (3-10)      | 17 (11-27)  |

Continuous and categorical variables are shown as median value (interquartile range) and number (percent).
